# Supplementary material for: Urinary miRNA-27b-3p and miRNA-1228-3p correlate with the progression of Kidney Fibrosis in Diabetic Nephropathy
Source: PubMed Central journal article supplement (PMC6684817; doi:10.1038/s41598-019-47778-1), 2019-08-06
Supplement: 41598_2019_47778_MOESM1_ESM.pdf [file 41598_2019_47778_MOESM1_ESM.pdf]

## **Urinary miRNA-27b-3p and miRNA-1228-3p correlate with the progression of Kidney Fibrosis in Diabetic Nephropathy**

Francesca Conserva<sup>§1</sup>, Mariagrazia Barozzino<sup>§1</sup>, Francesco Pesce<sup>1</sup>, Chiara Divella<sup>1</sup>, Annarita Oranger<sup>1</sup>, Massimo Papale<sup>1</sup>, Fabio Sallustio<sup>3</sup>, Simona Simone<sup>1</sup>, Luigi Laviola<sup>2</sup>, Francesco Giorgino<sup>2</sup>, Anna Gallone<sup>3</sup>, Paola Pontrelli<sup>°\*1</sup> and Loreto Gesualdo<sup>°1</sup>

<sup>1</sup> Department of Emergency and Organ Transplantation - Nephrology Unit, University of Bari Aldo Moro, Bari, Italy

<sup>2</sup> Department of Emergency and Organ Transplantation – Section of Internal Medicine, Endocrinology, Andrology and Metabolic Disease, University of Bari Aldo Moro, Bari, Italy

<sup>3</sup> Department of Basic Medical Sciences, Neurosciences and Sense Organs, University of Bari Aldo Moro, Bari, Italy

<sup>§</sup>These two authors equally contributed as first authors

<sup>°</sup> These two authors equally contributed as senior authors

**\*Corresponding author:** Paola Pontrelli

Department of Emergency and Organ Transplantation - Nephrology Unit

University of Bari Aldo Moro, Piazza Giulio Cesare, 11, 70124 Bari, ITALY

Telephone: +39 080 5478868; Fax: +39 080 5478 143

E-mail: *paola.pontrelli@uniba.it*

**Supplementary Table 1:** Fold change of deregulated miRNAs in diabetic kidneys and controls

| <b>miRBase<br/>Accession No</b> | <b>miRBase Rel. 14</b> | <b>miRBase Rel. 21</b> | <b>DN vs NK</b> | <b>DN vs<br/>T2DMN</b> | <b>T2DMN vs<br/>NK</b> |
|---------------------------------|------------------------|------------------------|-----------------|------------------------|------------------------|
| MIMAT0000062                    | hsa-let-7a             | hsa-let-7a-5p          | 3.91            | 1.73                   | 2.25                   |
| MIMAT0000063                    | hsa-let-7b             | hsa-let-7b-5p          | 2.55            | 2.19                   |                        |
| MIMAT0000064                    | hsa-let-7c             | hsa-let-7c-5p          |                 | 1.73                   |                        |
| MIMAT0000065                    | hsa-let-7d             | hsa-let-7d-5p          | 1.92            |                        |                        |
| MIMAT0000067                    | hsa-let-7f             | hsa-let-7f-5p          | 3.22            | 1.64                   | 1.97                   |
| MIMAT0000069                    | hsa-miR-16             | hsa-miR-16-5p          | 4.75            |                        | 3.10                   |
| MIMAT0000074                    | hsa-miR-19b            | hsa-miR-19b-3p         | 2.46            |                        |                        |
| MIMAT0000076                    | hsa-miR-21             | hsa-miR-21-5p          | 11.25           | 3.44                   |                        |
| MIMAT0000077                    | hsa-miR-22             | hsa-miR-22-3p          | 1.92            |                        | 2.41                   |
| MIMAT0000078                    | hsa-miR-23a            | hsa-miR-23a-3p         | 3.06            | 1.73                   |                        |
| MIMAT0000080                    | hsa-miR-24             | hsa-miR-24-3p          | 2.11            |                        | 2.51                   |
| MIMAT0000082                    | hsa-miR-26a            | hsa-miR-26a-5p         | 2.78            |                        | 3.36                   |
| MIMAT0000083                    | hsa-miR-26b            | hsa-miR-26b-5p         | 2.50            |                        | 2.25                   |
| MIMAT0000086                    | hsa-miR-29a            | hsa-miR-29a-3p         | 4.54            |                        | 4.44                   |
| MIMAT0000087                    | hsa-miR-30a            | hsa-miR-30a-5p         | 1.94            |                        | 2.13                   |
| MIMAT0000088                    | hsa-miR-30a*           | hsa-miR-30a-3p         | -1.75           | -1.50                  |                        |
| MIMAT0000097                    | hsa-miR-99a            | hsa-miR-99a-5p         | 2.51            |                        | 2.31                   |
| MIMAT0000100                    | hsa-miR-29b            | hsa-miR-29b-3p         | 2.85            |                        | 2.97                   |
| MIMAT0000101                    | hsa-miR-103            | hsa-miR-103a-3p        | 2.12            |                        | 2.23                   |
| MIMAT0000232                    | hsa-miR-199a-3p        | hsa-miR-199a-3p        | 4.40            |                        | 3.16                   |
| MIMAT0000244                    | hsa-miR-30c            | hsa-miR-30c-5p         |                 | 2.10                   |                        |
| MIMAT0000244                    | hsa-miR-30c            | hsa-miR-30c-5p         |                 |                        | -2.59                  |
| MIMAT0000245                    | hsa-miR-30d            | hsa-miR-30d-5p         | -1.83           |                        | -1.71                  |
| MIMAT0000253                    | hsa-miR-10a            | hsa-miR-10a-5p         | 1.82            |                        |                        |
| MIMAT0000267                    | hsa-miR-210            | hsa-miR-210-3p         |                 | -2.30                  |                        |
| MIMAT0000271                    | hsa-miR-214            | hsa-miR-214-3p         |                 | 3.89                   |                        |
| MIMAT0000279                    | hsa-miR-222            | hsa-miR-222-3p         |                 | -2.65                  |                        |
| MIMAT0000280                    | hsa-miR-223            | hsa-miR-223-3p         |                 | 6.58                   |                        |
| MIMAT0000414                    | hsa-let-7g             | hsa-let-7g-5p          | 3.93            |                        | 3.11                   |
| MIMAT0000415                    | hsa-let-7i             | hsa-let-7i-5p          | 3.87            |                        | 3.32                   |
| MIMAT0000419                    | hsa-miR-27b            | hsa-miR-27b-3p         | 1.87            | -1.89                  | 3.54                   |
| MIMAT0000420                    | hsa-miR-30b            | hsa-miR-30b-5p         | 1.71            |                        |                        |
| MIMAT0000423                    | hsa-miR-125b           | hsa-miR-125b-5p        | 2.45            | 3.19                   |                        |
| MIMAT0000425                    | hsa-miR-130a           | hsa-miR-130a-3p        | 3.17            |                        |                        |
| MIMAT0000434                    | hsa-miR-142-3p         | hsa-miR-142-3p         |                 | 7.86                   |                        |
| MIMAT0000437                    | hsa-miR-145            | hsa-miR-145-5p         | 1.94            | 1.92                   |                        |
| MIMAT0000443                    | hsa-miR-125a-5p        | hsa-miR-125a-5p        |                 | 2.13                   |                        |
| MIMAT0000443                    | hsa-miR-125a-5p        | hsa-miR-125a-5p        |                 |                        | -2.84                  |
| MIMAT0000445                    | hsa-miR-126            | hsa-miR-126-3p         | 2.53            |                        | 1.93                   |

|              |                 |                 |        |       |        |
|--------------|-----------------|-----------------|--------|-------|--------|
| MIMAT0000451 | hsa-miR-150     | hsa-miR-150-5p  |        | 10.47 |        |
| MIMAT0000459 | hsa-miR-193a-3p | hsa-miR-193a-3p |        | -3.35 |        |
| MIMAT0000461 | hsa-miR-195     | hsa-miR-195-5p  | 3.78   |       | 2.40   |
| MIMAT0000510 | hsa-miR-320a    | hsa-miR-320a    | -2.34  | -1.86 |        |
| MIMAT0000681 | hsa-miR-29c     | hsa-miR-29c-3p  | 2.96   |       | 4.35   |
| MIMAT0000688 | hsa-miR-301a    | hsa-miR-301a-3p |        | 2.67  |        |
| MIMAT0000710 | hsa-miR-365     | hsa-miR-365a-3p |        | 3.89  |        |
| MIMAT0000727 | hsa-miR-374a    | hsa-miR-374a-5p |        | 3.47  |        |
| MIMAT0000753 | hsa-miR-342-3p  | hsa-miR-342-3p  |        | 2.84  |        |
| MIMAT0000762 | hsa-miR-324-3p  | hsa-miR-324-3p  |        | 1.76  |        |
| MIMAT0001343 | hsa-miR-425*    | hsa-miR-425-3p  | -17.31 |       | -13.98 |
| MIMAT0001618 | hsa-miR-191*    | hsa-miR-191-3p  | -17.97 |       | -15.94 |
| MIMAT0002809 | hsa-miR-146b-5p | hsa-miR-146b-5p |        | 4.23  |        |
| MIMAT0002876 | hsa-miR-505     | hsa-miR-505-3p  |        | 2.39  |        |
| MIMAT0002877 | hsa-miR-513a-5p | hsa-miR-513a-5p | -6.62  | 4.84  | -32.06 |
| MIMAT0002888 | hsa-miR-532-5p  | hsa-miR-532-5p  |        | -2.46 |        |
| MIMAT0003237 | hsa-miR-572     | hsa-miR-572     | -9.36  |       | -3.92  |
| MIMAT0003308 | hsa-miR-638     | hsa-miR-638     | -4.57  | -1.92 | -2.38  |
| MIMAT0003326 | hsa-miR-663     | hsa-miR-663a    |        | -2.30 |        |
| MIMAT0003888 | hsa-miR-766     | hsa-miR-766-3p  | -11.28 |       | -4.96  |
| MIMAT0004556 | hsa-miR-10b*    | hsa-miR-10b-3p  |        | -1.89 |        |
| MIMAT0004682 | hsa-miR-361-3p  | hsa-miR-361-3p  |        | 2.23  |        |
| MIMAT0004795 | hsa-miR-574-5p  | hsa-miR-574-5p  | -5.97  |       | -7.60  |
| MIMAT0004911 | hsa-miR-874     | hsa-miR-874-3p  |        | -3.56 |        |
| MIMAT0004955 | hsa-miR-374b    | hsa-miR-374b-5p |        | 2.09  |        |
| MIMAT0004976 | hsa-miR-933     | hsa-miR-933     | -40.09 |       | -12.49 |
| MIMAT0004982 | hsa-miR-939     | hsa-miR-939-5p  | -6.05  |       |        |
| MIMAT0004983 | hsa-miR-940     | hsa-miR-940     | -10.45 |       | -8.92  |
| MIMAT0005572 | hsa-miR-1225-5p | hsa-miR-1225-5p | -3.28  |       |        |
| MIMAT0005573 | hsa-miR-1225-3p | hsa-miR-1225-3p | -17.68 | -2.29 | -7.73  |
| MIMAT0005583 | hsa-miR-1228    | hsa-miR-1228-3p | -16.98 | -2.20 | -7.70  |
| MIMAT0005589 | hsa-miR-1234    | hsa-miR-1234-3p | -18.28 |       | -10.39 |
| MIMAT0005592 | hsa-miR-1237    | hsa-miR-1237-3p |        |       | -7.30  |
| MIMAT0005593 | hsa-miR-1238    | hsa-miR-1238-3p | -18.64 |       | -14.13 |
| MIMAT0005788 | hsa-miR-513b    | hsa-miR-513b-5p | -6.01  |       |        |
| MIMAT0005792 | hsa-miR-320b    | hsa-miR-320b    | -1.62  |       | -1.69  |
| MIMAT0005793 | hsa-miR-320c    | hsa-miR-320c    | -1.59  | 1.80  | -2.88  |
| MIMAT0005865 | hsa-miR-1202    | hsa-miR-1202    | -2.86  |       |        |
| MIMAT0005871 | hsa-miR-1207-5p | hsa-miR-1207-5p | -2.56  |       | -2.22  |
| MIMAT0005898 | hsa-miR-1246    | hsa-miR-1246    |        |       | -4.02  |
| MIMAT0005911 | hsa-miR-1260    | hsa-miR-1260a   | -2.37  |       | -3.98  |
| MIMAT0005922 | hsa-miR-1268    | hsa-miR-1268a   | -5.87  | -2.57 |        |
| MIMAT0005929 | hsa-miR-1275    | hsa-miR-1275    | -3.52  | -3.45 |        |
| MIMAT0005939 | hsa-miR-1281    | hsa-miR-1281    | -16.60 |       | -9.92  |

|              |              |                 |        |      |        |
|--------------|--------------|-----------------|--------|------|--------|
| MIMAT0006764 | hsa-miR-320d | hsa-miR-320d    | -2.02  | 1.89 | -3.82  |
| MIMAT0006765 | hsa-miR-1825 | hsa-miR-1825    | -18.05 |      | -15.29 |
| MIMAT0007892 | hsa-miR-1915 | hsa-miR-1915-3p | -4.61  |      | -3.01  |
| MIMAT0009448 | hsa-miR-1973 | hsa-miR-1973    | -13.45 |      |        |
| MIMAT0010313 | hsa-miR-762  | hsa-miR-762     | -5.41  |      |        |

**Supplementary Table 2:** logistic regression model including miR-1228-3p and miR-27b-3p urinary levels to predict the diagnosis of DN versus NDRD (upper panel) and DN versus CKD (lower panel).

| <b>DN vs NDRD<br/>Variable</b>  | <b>P value</b> | <b>OR</b> | <b>95% CI</b> |
|---------------------------------|----------------|-----------|---------------|
| <b>miR-1228-3p<br/>(RR/uCr)</b> | 0.01           | 0.002     | 0.0006-0.6381 |
| <b>miR-27b-3p<br/>(RR/uCr)</b>  | 0.002          | 0.002     | 0.001-1.061   |

| <b>DN vs CKD<br/>Variable</b>   | <b>P value</b> | <b>OR</b> | <b>95% CI</b> |
|---------------------------------|----------------|-----------|---------------|
| <b>miR-1228-3p<br/>(RR/uCr)</b> | 0.002          | 0.001     | 0.0007-0.149  |
| <b>miR-27b-3p<br/>(RR/uCr)</b>  | 0.007          | 0.05      | 0.005-0.552   |
